# Supplementary material for: Insight into the Ga/In flux ratio and crystallographic plane dependence of MBE self-assembled growth of InGaN nanorods on patterned sapphire substrates
Source: Royal Society of Chemistry journal article supplement (doi:10.1039/c9nr09767h), 2020-01-01
Supplement: c9nr09767h1.pdf [file c9nr09767h1.pdf]

## Electronic Supplementary Information (ESI)

### **Insight into the Ga/In flux ratio and crystallographic plane dependence for MBE assembly growth of InGaN nanorods on patterned sapphire substrates**

Jian Shen,<sup>‡a b d</sup> Yuefeng Yu,<sup>‡a c</sup> Jia Wang,<sup>d</sup> Yulin Zheng,<sup>a c</sup> Yang Gan,<sup>\* b</sup> Guoqiang Li<sup>\* a c</sup>

<sup>a</sup> State Key Laboratory of Luminescent Materials and Devices, South China University of Technology, Guangzhou 510640, China.

<sup>b</sup> School of Chemistry and Chemical Engineering, Harbin Institute of Technology, Harbin 150001, China.

<sup>c</sup> Engineering Research Center on Solid-State Lighting and its Informationisation of Guangdong Province, South China University of Technology, Guangzhou 510640, China.

<sup>d</sup> Center for Integrated Research of Future Electronics, and Institute of Materials and Systems for Sustainability, Nagoya University, Nagoya 464-8601, Japan

<sup>‡</sup>These authors contributed equally.

\*Corresponding author, E-mail: ygan@hit.edu.cn and msgli@scut.edu.cn.

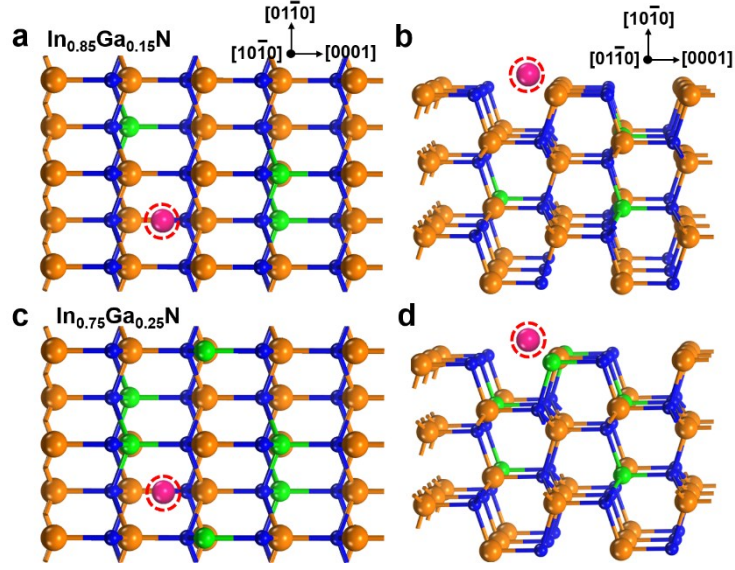

**Fig. S1** The simulated top-view and side-view schematic illustrations of the (100) plane of (a) and (b)  $\text{In}_{0.85}\text{Ga}_{0.15}\text{N}$ , (c) and (d)  $\text{In}_{0.75}\text{Ga}_{0.25}\text{N}$ .

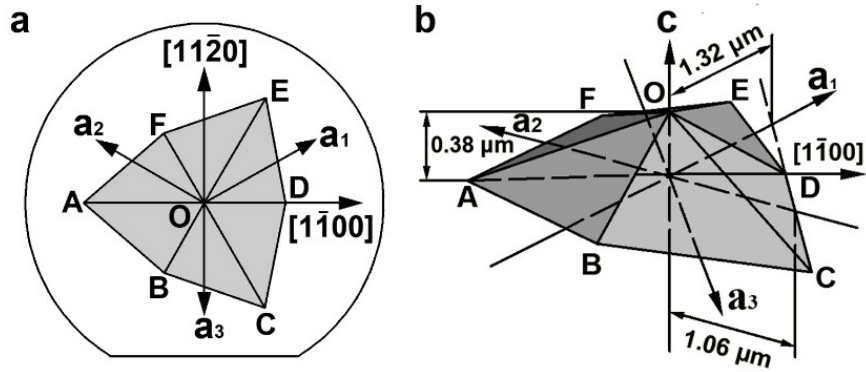

**Fig. S2** (a) The constructed hexagonal pyramid (OABCDEF) on the  $c$ -plane sapphire wafer with known crystallographic orientations of  $[1\ 1\ \bar{0}]$  and  $[1\ \bar{0}\ 0]$ . (b) A model hexagonal pyramid with a hexagonal coordinate system for determining intercepts of  $C_3$ -plane on  $a_1$ -,  $a_2$ -, and  $c$ -axes.

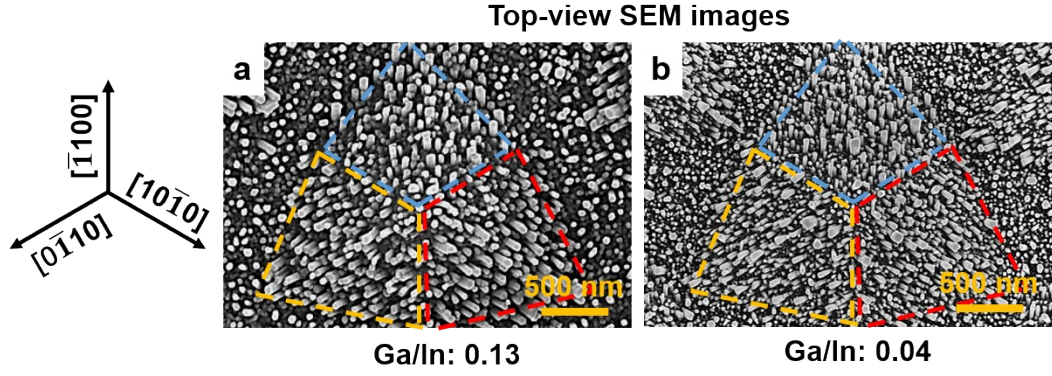

**Fig. S3** The inclination and corresponding projected crystallographic orientation of InGaN NRs on  $C_3$ -planes of hexagonal pyramids grown with the Ga/In flux ratio of (a) 0.13 and (b) 0.04 in top-view SEM images.

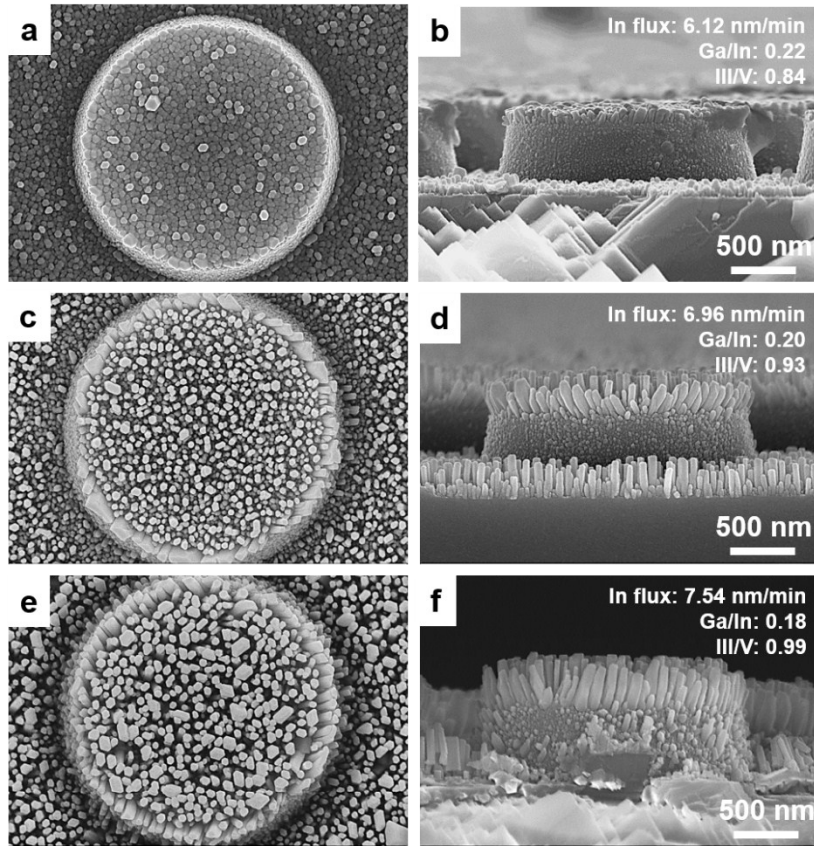

**Fig. S4** Top-view and side-view SEM images of InGaN compact layers and NRs grown on faceted cylinder PSS with varying In flux of (a) and (b) 6.12 nm/min, (c) and (d) 6.96 nm/min, (e) and (f) 7.54 nm/min.

Fig. S5(a) shows the PL spectrum of InGaN NRs grown with varying Ga/In flux ratio (0.04–0.33). The PL spectral peak positions of InGaN samples with Ga/In flux ratio of 0.33, 0.22, 0.13, and 0.04, are determined to be 771.1 nm, 794.7 nm, 854.7 nm, and 912.9 nm, respectively. Then, the bandgap of InGaN samples with Ga/In flux ratio of 0.33, 0.22, 0.13, and 0.04, are determined to be 1.61 eV, 1.56 eV, 1.45 eV, and 1.36 eV, respectively. It is well accepted that the bandgap of  $\text{In}_{(1-x)}\text{Ga}_x\text{N}$  can be well fitted by the following standard bowing equation<sup>1-3</sup>:

$$E_g(\text{In}_{1-x}\text{Ga}_x\text{N}) = xE_g(\text{GaN}) + (1-x)E_g(\text{InN}) - bx(1-x)$$

For  $\text{In}_{(1-x)}\text{Ga}_x\text{N}$  nanowire model, the corresponding parameters have been determined:  $E_g(\text{GaN}) = 3.43$  eV;  $E_g(\text{InN}) = 1.12$  eV;  $b = 1.01$  eV.<sup>1</sup> In this model,  $E_g(\text{InN})$  of 1.12 eV was employed instead of the 0.7 eV value in recent reports<sup>2</sup>. A proposed explanation of the disparate results is that there is a dependence of the bandgap on the free-electron concentration<sup>4</sup>. Based on the chemical composition of InGaN NRs determined by EDXS and HRTEM characterizations, it can be found that the relationship among PL peak position, bandgap, and composition of as-obtained InGaN NRs in our works corresponds well with the reported bowing equation of InGaN nanowire model.<sup>1</sup> Therefore, based on the known bandgap and PL spectral peak position, using standard bowing equation, the component of InGaN NRs with the Ga/In flux ratio of 0.33, 0.22, 0.13, and 0.04, is then determined as  $\text{In}_{0.69}\text{Ga}_{0.31}\text{N}$ ,  $\text{In}_{0.72}\text{Ga}_{0.28}\text{N}$ ,  $\text{In}_{0.78}\text{Ga}_{0.22}\text{N}$ , and  $\text{In}_{0.84}\text{Ga}_{0.16}\text{N}$ , respectively, which is similar to the EDXS result.

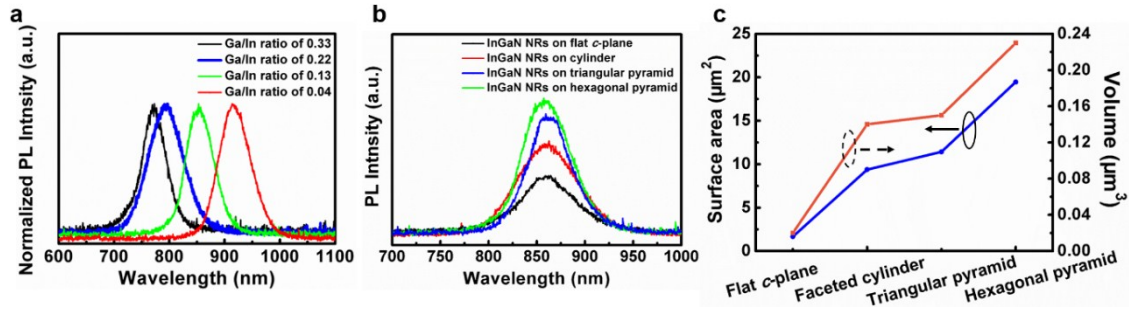

**Fig. S5** (a) Room temperature PL spectrum of InGaN samples grown with Ga/In ratio of 0.33, 0.22, 0.13, and 0.04. (b) Room temperature PL spectrum, and (b) surface area and volume of InGaN NRs (over a  $1.0 \times 1.0 \mu\text{m}^2$  projected area) with the Ga/In flux ratio of 0.13 on flat *c*-plane substrate, faceted cylinder with curved  $C_0$ -zone and top *c*-plane, triangular pyramid with rough  $C_2$ -plane, as well as hexagonal pyramid with  $C_3$ -plane.

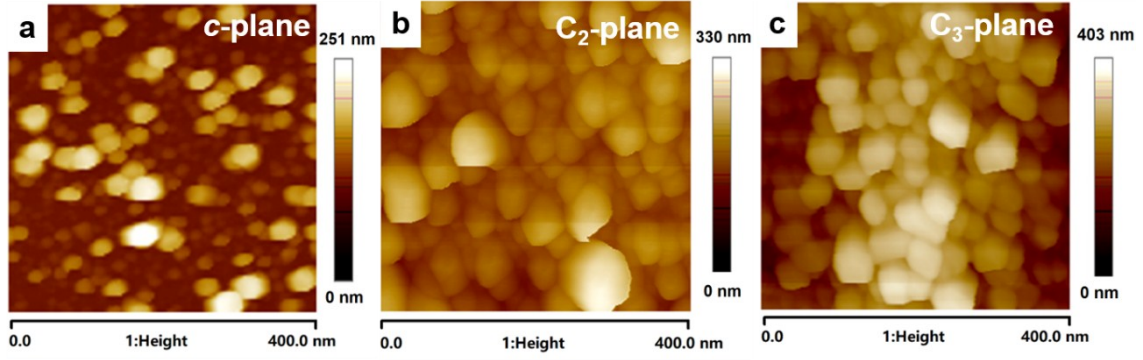

**Fig. S6** AFM plane-view images of InGaN nucleated islands grown with the Ga/In flux ratio of 0.13 and the growth time of 15 min on (a) *c*-plane, (b)  $C_2$ -plane, and (c)  $C_3$ -plane.

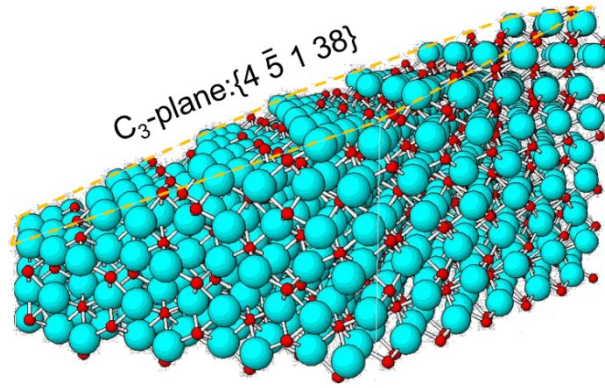

**Fig. S7** Simulated atom arrangement in the step-terrace structures of  $C_3$ -plane of high Miller index ( $\{4 \ 1 \ 38\}$ ).

**Table S1** Analysis of the Ga, In, N fluxes, and the determination of Ga/In, III/V, Ga/N flux ratios in growth condition. Analysis of the In-contents in InGaN NRs determined by PL and EDXS, as well as calculated by the effective In and Ga fluxes.

| Ga flux<br>(nm/min) | In flux<br>(nm/min) | N flux<br>(nm/min) | Ga/In<br>ratio | III/V<br>ratio | Ga/N<br>ratio | In-content<br>from PL | In-content<br>from EDXS | Calculated<br>In-content |
|---------------------|---------------------|--------------------|----------------|----------------|---------------|-----------------------|-------------------------|--------------------------|
| 2.01                | 6.12                | 8.97               | 0.33           | 0.91           | 0.22          | 0.69                  | 0.67                    | 0.75                     |
| 1.37                | 6.12                | 8.97               | 0.22           | 0.84           | 0.15          | 0.72                  | 0.71                    | 0.81                     |
| 0.79                | 6.12                | 8.97               | 0.13           | 0.77           | 0.08          | 0.78                  | 0.77                    | 0.89                     |
| 0.27                | 6.12                | 8.97               | 0.04           | 0.71           | 0.03          | 0.84                  | 0.85                    | 0.96                     |

Table S1 reveals the difference of experimentally determined In-contents (PL and EDXS) and calculated In-contents ( $x_{In} = In_{eff} / (In_{eff} + Ga_{eff})$ ) from the determined effective In/Ga fluxes ( $In_{eff}$  and  $Ga_{eff}$ ). The calculated In-contents from effective Ga/In fluxes is based on the precondition of complete incorporation of In and Ga. It can be found that the measured In-

contents in InGaN are 8%–12% lower than calculated In-contents. As reported, the In flux can be completely incorporated at the growth temperature below 500°C, and the In-content in InGaN continuously decreases as growth temperature increases from 500°C to 700°C due to the In desorption.<sup>5, 6</sup> The significant In-content decrease of 10% can be found at higher growth temperature of 565–580°C<sup>5</sup> and 575–600°C<sup>6</sup>. Therefore, the In-content decrease of 8%–12% at the higher growth temperature of 576–579°C than that below 500°C (for the case of complete incorporation) can be confidently attributed to the measurable In desorption.

## References

- 1 T. Kuykendall, P. Ulrich, S. Aloni and P. J. N. m. Yang, *Nat. Mater.*, 2007, **6**, 951-956.
- 2 J. Wu, *J. Appl. Phys.*, 2009, **106**, 011101.
- 3 J. Wu, W. Walukiewicz, K. M. Yu, J. Ager III, E. Haller, H. Lu and W. Schaff, *Appl. Phys. Lett.*, 2002, **80**, 4741-4743.
- 4 J. Wu, W. Walukiewicz, W. Shan, K. Yu, J. Ager III, E. Haller, H. Lu and W. Schaff, *Phys. Rev. B*, 2002, **66**, 201403.
- 5 R. Averbeck and H. Riechert, *Phys. Stat. Sol.*, 1999, **176**, 301-305.
- 6 I. Stanley, G. Coleiny and R. Venkat, *J. Cryst. Growth*, 2003, **251**, 23-28.
